# Supplementary material for: Circulating levels of soluble urokinase plasminogen activator receptor predict outcome after resection of biliary tract cancer
Source: PubMed Central journal article supplement — JHEP Rep. 2020 Jan 31;2(2):100080. doi: 10.1016/j.jhepr.2020.100080 (PMC7049662; doi:10.1016/j.jhepr.2020.100080), 2020-01-31
Supplement: mmc2.pdf [file mmc2.pdf]

## JHEP Reports

### CTAT methods

Tables for a “Complete, Transparent, Accurate and Timely account” (CTAT) are now mandatory for all revised submissions. The aim is to enhance the reproducibility of methods.

- Only include the parts relevant to your study
- Refer to the CTAT in the main text as ‘Supplementary CTAT Table’
- Do not add subheadings
- Add as many rows as needed to include all information
- Only include one item per row

If the CTAT form is not relevant to your study, please outline the reasons why:

|  |
|--|
|  |
|--|

#### 1.1 Antibodies

| Name                       | Citation | Supplier                           | Cat no.  | Clone no. |
|----------------------------|----------|------------------------------------|----------|-----------|
| Human suPAR ELISA          | -        | ViroGates,<br>Birkerød,<br>Denmark | A001     | n.a.      |
| Anti-uPA Receptor antibody | -        | Abcam,<br>Cambridge, UK            | ab218106 | n.a       |

#### 1.2 Cell lines

| Name | Citation | Supplier | Cat no. | Passage no. | Authentication test method |
|------|----------|----------|---------|-------------|----------------------------|
| -    | -        | -        | -       | -           | -                          |

#### 1.3 Organisms

| Name | Citation | Supplier | Strain | Sex | Age | Overall n number |
|------|----------|----------|--------|-----|-----|------------------|
| -    | -        | -        | -      | -   | -   | -                |

#### 1.4 Sequence based reagents

| Name | Sequence | Supplier |
|------|----------|----------|
| -    | -        | -        |

#### 1.5 Biological samples

| Description             | Source                                                  | Identifier                 |
|-------------------------|---------------------------------------------------------|----------------------------|
| Human CCA tumor tissue  | University Hospital RWTH Aachen, Institute of Pathology | Prof. Dr. Thomas Longerich |
| Human CCA serum samples | University Hospital RWTH Aachen, Department of Surgery  | Prof. Dr. Ulf P. Neumann   |

## 1.6 Deposited data

| Name of repository | Identifier | Link |
|--------------------|------------|------|
| -                  | -          | -    |

## 1.7 Software

| Software name   | Manufacturer | Version                                                       |
|-----------------|--------------|---------------------------------------------------------------|
| Excel           | Microsoft    | Microsoft Office Professional 2010<br>Version: 14.0.6023.1000 |
| Word            | Microsoft    | Microsoft Office Professional 2010<br>Version: 14.0.6023.1000 |
| SPSS Statistics | IBM          | Version: 23.0.0.0                                             |

## 1.8 Other (e.g. drugs, proteins, vectors etc.)

|   |   |   |
|---|---|---|
| - | - | - |
|---|---|---|

## 1.9 Please provide the details of the corresponding methods author for the manuscript:

**Tom Luedde, MD/PhD**  
 Professor of Medicine  
 Division of Gastroenterology, Hepatology and Hepatobiliary Oncology  
 University Hospital RWTH Aachen  
 Pauwelsstrasse 30, 52074 Aachen, Germany  
 Email: [tluedde@ukaachen.de](mailto:tluedde@ukaachen.de)  
 Fax: +49-(0)241-8082455

## 2.0 Please confirm for randomised controlled trials all versions of the clinical protocol are included in the submission. These will be published online as supplementary information.

Not applicable
